# Supplementary material
Source: Research Square preprint supplement (doi:10.21203/rs.3.rs-8947766/v1)
Supplement: Supplementary file 1 [file 98dede87b7aeb4fe640df3d6.xlsx]

## Sheet: EASIX
Table 1. Patient and transplantation characteristic.
Characteristics	Number of patients n = 434
Median age at SCT (years)	37 (18-66)
Male sex	254 (58.5%)
Diagnosis
AML	200 (46.1%)
ALL	112 (25.8%)
MDS	90 (20.7%)
Others	32 (7.4%)
HCT-CI
0	249 (57.4%)
1	77 (17.7%)
2	48 (11.1%)
≥3	45 (10.4%)
Not applicable	15 (3.5%)
DRI
Low	34 (7.8%)
Intermediate	329 (75.8%)
High	68 (15.7%)
Very High	3 (0.7%)
Stem cell source
Bone marrow and PBSC	50 (11.5%)
PBSC	384 (88.5%)
Conditioning
MAC	345 (79.5%)
RTC	89 (20.5%)
Median donor age at HSCT (years)	39 (8-70)
Female donor to male repient	98 (22.6%)
Graft characteristics
Median MNCs (×108/kg) (range)	8.78 (4.05-18.93)
Median CD34+ cells (×106/kg) (range)	3.35 (0.47-14.10)
Abbreviatioins: AML, acute myeloid leukemia; ALL, acute lymphoblastic leukemia; MDS,myelodysplastic syndrome; HCT-CI, hematopoietic cell transplantation–specific comorbidity index; DRI, disease risk index; PBSC perpheral blood stem cells; MAC, myeloablative conditioning; RTC, reduced-toxicity conditioning; HSCT, hematopoietic stem cell transplantation; MNCs, mononuclear cells
