# Supplementary material
Source: Research Square preprint supplement (doi:10.21203/rs.3.rs-8947766/v1)
Supplement: Supplementary file 2 [file fa02fa1cb57e75b685b3ca90.xlsx]

## Sheet: Sheet2
Table 2. Univariate analysis of risk factors.
	GRFS			platelet engraftment			grade III–IV aGVHD			cGVHD			moderate to severe cGVHD
Variable	HR (95%CI)	p value		HR (95%CI)	p value		HR (95%CI)	p value		HR (95%CI)	p value		HR (95%CI)	p value
EASIX (two-fold change)	1.19 (1.08-1.30)	<0.001		0.90 (0.84-0.97)	0.003		1.18 (0.99-1.40)	0.06		1.08 (0.99-1.18)	0.08		1.31 (1.16-1.47)	<0.001
Age per year	1.01 (1.00-1.02)	0.24		1.00 (0.99-1.0)	0.34		0.96 (0.94-0.99)	0.002		1.00 (0.99-1.01)	0.57		1.00 (0.99-1.02)	0.8
DRI (High/Very high vs. Intermediate)	1.23 (0.91-1.65)	0.17		0.98 (0.83-1.16)	0.79		1.06 (0.65-1.73)	0.81		1.07 (0.78-1.47)	0.66		0.98 (0.57-1.70)	0.95
Donor age per year	1.01 (1.00-1.02)	0.27		1.00 (0.99-1.0)	0.75		1.04 (1.02-1.06)	<0.001		1.00 (0.99-1.01)	0.79		1.00 (0.99-1.02)	0.98
Female donor to male repient (no vs. yes)	1.05 (0.75-1.49)	0.77		0.88 (0.72-1.06)	0.17		0.63 (0.29-1.33)	0.22		1.32 (0.96-1.81)	0.09		1.62 (1.01-2.60)	0.05
Conditioning (MAC vs. RIC)	0.88 (0.61-1.28)	0.51		1.27 (1.00-1.62)	0.05		1.15 (0.58-2.27)	0.69		1.14 (0.81-1.62)	0.46		1.41 (0.77-2.56)	0.26
Abbreviatioins: EASIX, Endothelial Activation and Stress Index; DRI, disease risk index; MAC, myeloablative conditioning; RTC, reduced-toxicity conditioning; aGVHD, acute graft-versus-host disease; cGVHD, chronic GVHD; GRFS, GVHD-free, relapse-free survival.
